# Supplementary material for: Assessment of a Risk-Based Approach for Triaging Mammography Examinations During Periods of Reduced Capacity
Source: PubMed Central journal article supplement (PMC7994953; doi:10.1001/jamanetworkopen.2021.1974), 2021-03-25

## Supplemental Online Content

Miglioretti DL, Bissell MCS, Kerlikowske K, et al. Assessment of a risk-based approach for triaging mammography examinations during periods of reduced capacity. *JAMA Netw Open*. 2021;4(3):e211974. doi:10.1001/jamanetworkopen.2021.1974

**eTable.** Description of Subgroups From Classification and Regression Tree Models

**eFigure.** Flowcharts Showing Which Mammograms Should be Scheduled as Soon as Possible for Facilities Operating at Limited Capacity

This supplemental material has been provided by the authors to give readers additional information about their work.

**eTable.** Description of Subgroups From Classification and Regression Tree Models

| Risk group<br>(% of<br>mammograms, % of<br>detected cancers) | Clinical indication and relevant risk factors                | History of<br>breast cancer<br>and time since<br>diagnosis, y | Age, y | Mammograms<br>(N=1,878,924) |                 | Cancers<br>(N=21,624) |                 | Cancer Detection<br>Rate per 1000<br>(95% CI) |
|--------------------------------------------------------------|--------------------------------------------------------------|---------------------------------------------------------------|--------|-----------------------------|-----------------|-----------------------|-----------------|-----------------------------------------------|
|                                                              |                                                              |                                                               |        | %                           | Cumulative<br>% | %                     | Cumulative<br>% |                                               |
| Very high risk<br>(3.1%, 25.3%)                              | Evaluation for abnormal mammogram or lump <sup>a</sup>       | PHBC, ≥10 y                                                   | Any    | 0.2%                        | 0.2%            | 2.9%                  | 2.9%            | 178.5 (153.0, 207.2)                          |
|                                                              | Evaluation for abnormal mammogram or lump <sup>a</sup>       | 5-9 years                                                     | Any    | 0.1%                        | 0.3%            | 0.8%                  | 3.7%            | 102.3 (87.5, 119.3)                           |
|                                                              | Evaluation for abnormal mammogram or lump <sup>a</sup>       | No PHBC                                                       | ≥60    | 2.7%                        | 3.0%            | 20.8%                 | 24.6%           | 89.6 (82.3, 97.5)                             |
|                                                              | Evaluation for abnormal mammogram or lump <sup>a</sup>       | <5 years                                                      | Any    | 0.1%                        | 3.1%            | 0.8%                  | 25.3%           | 62.5 (52.6, 74.2)                             |
| High Risk<br>(8.9%, 29.7%)                                   | Evaluation for abnormal mammogram or lump <sup>a</sup>       | No PHBC                                                       | 50-59  | 2.9%                        | 6.0%            | 12.2%                 | 37.5%           | 48.5 (44.5, 52.9)                             |
|                                                              | SIFU or evaluation for symptoms other than lump <sup>a</sup> | No PHBC                                                       | ≥60    | 1.9%                        | 7.9%            | 7.7%                  | 45.3%           | 47.5 (42.4, 53.3)                             |
|                                                              | Evaluation for symptoms other than lump                      | PHBC, any                                                     | Any    | 0.1%                        | 8.0%            | 0.3%                  | 45.6%           | 40.9 (29.7, 56.0)                             |
|                                                              | Evaluation for lump <sup>a</sup>                             | No PHBC                                                       | <50    | 2.0%                        | 9.9%            | 5.6%                  | 51.2%           | 32.4 (28.7, 36.6)                             |
|                                                              | Evaluation for abnormal mammogram                            | No PHBC                                                       | <50    | 2.0%                        | 12.0%           | 3.8%                  | 55.0%           | 21.9 (19.2, 25.0)                             |
| Moderate Risk<br>(7.2%, 9.1%)                                | Surveillance in women with family history                    | PHBC, ≥10 y <sup>b</sup>                                      | Any    | 0.9%                        | 12.9%           | 1.7%                  | 56.7%           | 21.6 (18.4, 25.3)                             |
|                                                              | Surveillance in women without a family history               | PHBC, ≥10 y <sup>b</sup>                                      | ≥70    | 1.0%                        | 13.9%           | 1.6%                  | 58.4%           | 19.1 (16.2, 22.6)                             |
|                                                              | SIFU                                                         | PHBC, any                                                     | 70     | 0.1%                        | 14.0%           | 0.2%                  | 58.5%           | 15.4 (10.0, 23.7)                             |
|                                                              | Surveillance in women without a family history               | PHBC, ≥10 y <sup>b</sup>                                      | <70    | 1.2%                        | 15.2%           | 1.6%                  | 60.1%           | 14.7 (12.8, 16.9)                             |
|                                                              | Screening women with history of high-risk lesion             | No PHBC                                                       | Any    | 0.3%                        | 15.5%           | 0.4%                  | 60.5%           | 12.7 (10.1, 16.0)                             |
|                                                              | SIFU or evaluation for symptoms other than lump              | No PHBC                                                       | <60    | 2.2%                        | 17.8%           | 2.3%                  | 62.8%           | 11.7 (9.9, 13.9)                              |
|                                                              | Surveillance                                                 | PHBC, <10 y                                                   | ≥70    | 1.4%                        | 19.2%           | 1.4%                  | 64.2%           | 11.6 (9.8, 13.6)                              |
| Low Risk<br>(36.7%, 22.7%)                                   | Surveillance, >1 year since last mammogram                   | PHBC, <10 y                                                   | <70    | 0.8%                        | 20.0%           | 0.7%                  | 64.9%           | 9.9 (7.8, 12.5)                               |
|                                                              | First screen or >1 year since last mammogram <sup>c</sup>    | No PHBC                                                       | ≥60    | 13.5%                       | 33.5%           | 10.7%                 | 75.6%           | 9.1 (8.5, 9.8)                                |
|                                                              | SIFU in women with not dense breasts                         | PHBC, any                                                     | <70    | 0.1%                        | 33.6%           | 0.1%                  | 75.7%           | 8.1 (4.8, 13.7)                               |
|                                                              | Annual surveillance                                          | PHBC, 5-9 y                                                   | <70    | 1.0%                        | 34.6%           | 0.6%                  | 76.3%           | 7.4 (5.9, 9.2)                                |
|                                                              | SIFU in women with dense breasts                             | PHBC, any                                                     | <70    | 0.1%                        | 34.7%           | 0.1%                  | 76.4%           | 6.5 (3.7, 11.6)                               |
|                                                              | Annual screen                                                | No PHBC                                                       | ≥70    | 8.7%                        | 43.4%           | 4.6%                  | 81.0%           | 6.1 (5.6, 6.7)                                |
|                                                              | Surveillance                                                 | PHBC, <5 y                                                    | <70    | 1.1%                        | 44.5%           | 0.6%                  | 81.6%           | 6.0 (5.0, 7.1)                                |
|                                                              | First screen or >1 year since last mammogram <sup>c</sup>    | No PHBC                                                       | 50-59  | 11.3%                       | 55.8%           | 5.3%                  | 86.9%           | 5.4 (4.9, 5.9)                                |
| Very Low Risk<br>(44.2%, 13.1%)                              | Annual screen                                                | No PHBC                                                       | 60-69  | 13.5%                       | 69.3%           | 5.3%                  | 92.2%           | 4.6 (4.2, 5.0)                                |
|                                                              | First screen or >1 year since last mammogram <sup>c</sup>    | No PHBC                                                       | <50    | 8.9%                        | 78.3%           | 2.8%                  | 95.1%           | 3.6 (3.2, 4.1)                                |
|                                                              | Annual screen                                                | No PHBC                                                       | 50-59  | 13.4%                       | 91.6%           | 3.5%                  | 98.6%           | 3.0 (2.8, 3.3)                                |
|                                                              | Annual screen                                                | No PHBC                                                       | <50    | 8.4%                        | 100.0%          | 1.4%                  | 100.0%          | 2.0 (1.8, 2.2)                                |

Abbreviations: PHBC = personal history of breast cancer, y = years, SIFU = short interval follow up, CI=confidence interval

<sup>a</sup>Includes evaluation of clinical signs or symptoms, but symptoms are not specified.

<sup>b</sup>Includes unknown time since breast cancer diagnosis.

<sup>c</sup>Includes unknown time since last mammogram.

**eFigure.** Flowcharts Showing Which Mammograms Should be Scheduled as Soon as Possible for Facilities Operating at Limited Capacity

(a) 12% and (b) 20% operating capacity. All other mammograms should be scheduled as capacity allows.

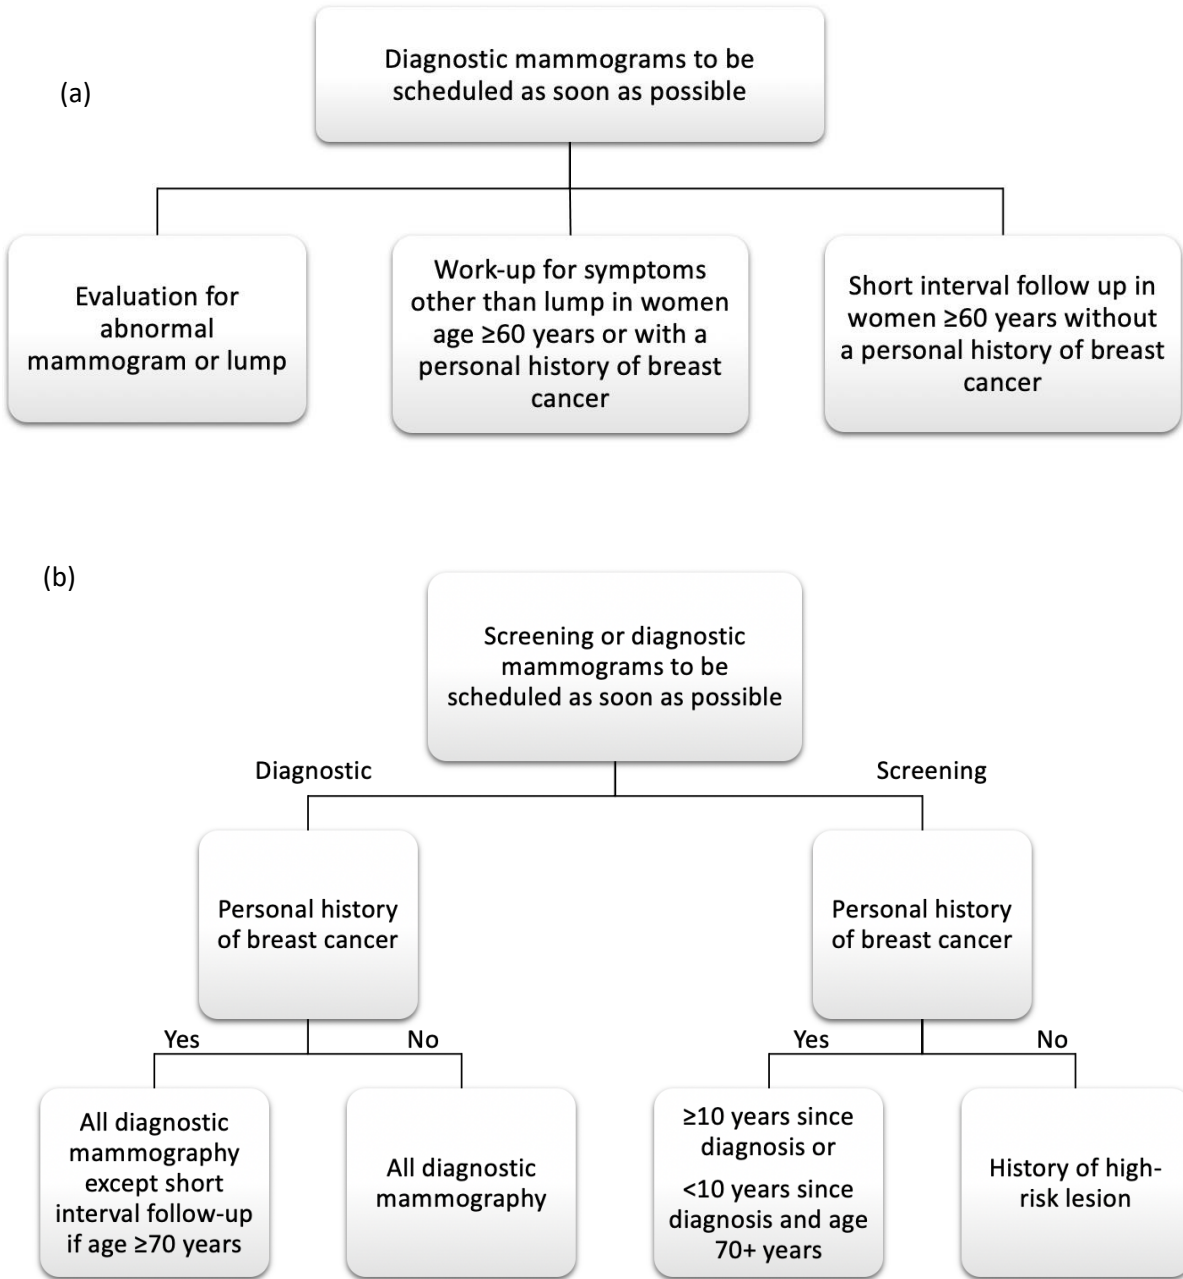

Supplement: jamanetwopen-e211974-s001.pdf [file jamanetwopen-e211974-s001.pdf]
